# Supplementary material
Source: Springer Nature journal article supplement (https://www.springermedizin.de/resource/supplementary/12885_2012_3917_MOESM6_ESM.pdf/9464680)

Empty vector    Notch1

**A**

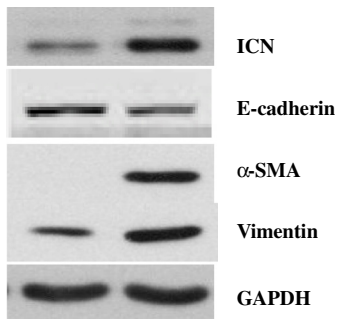

**B**

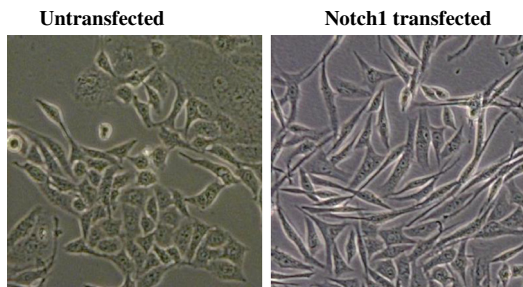

**C**

Untransfected

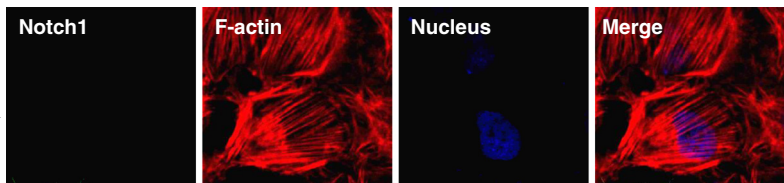

**D**

Notch1 transfected

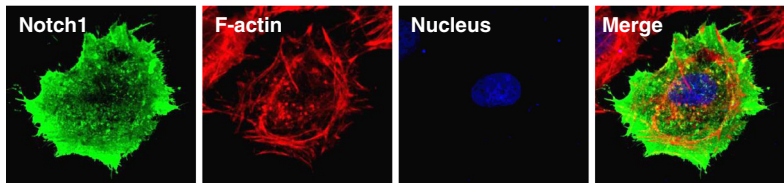

Supplement: MOESM6 [file 9464680]
